# Supplementary material for: Hypoxia-enhanced YAP1-EIF4A3 interaction drives circ_0007386 circularization by competing with CRIM1 pre-mRNA linear splicing and promotes non-small cell lung cancer progression
Source: PubMed Central journal article supplement (PMC11264895; doi:10.1186/s13046-024-03116-6), 2024-07-20
Supplement: 13046_2024_3116_MOESM2_ESM.pdf [file 13046_2024_3116_MOESM2_ESM.pdf]

**Table S1** Probes and siRNAs used in the experiments.

| 名称                   | 序列( 5' → 3' )                                    |
|----------------------|--------------------------------------------------|
| Negative control     | UUCUCCGAACGUGUCACGUTT<br>ACGUGACACGUUCGGAGAATT   |
| si-has_circ_0007386  | CCAACAAGAAGAGAAGCCATT<br>UGGCUUCUCUUCUUGUUGGTT   |
| miR-383-5p mimics    | AGAUCAGAAGGUGAUUGUGGCU<br>CCACAAUCACCUUCUGAUCUUU |
| inhibitor NC         | CAGUACUUUUGUGUAGUACAA                            |
| miR-383-5p inhibitor | AGCCACAAUCACCUUCUGAUCU                           |
| si-CIRBP-242         | GAUCUCUGAAGUGGUGGUUTT<br>AACCACCACUUCAGAGAUCTT   |
| si-CIRBP-344         | GGCCAUGAAUGGGAAGUCUTT<br>AGACUCCCAUUCAUGGCCTT    |
| si-CIRBP-621         | GGGUCCUACAGAGACAGUUTT<br>AACUGUCUCUGUAGGACCCTT   |
| si-YAP1-homo         | GGUGAUACUAUCAACCAAATT<br>UUUGGUUGAUAGUAUCACCTT   |
| si-EIF4A3-homo       | UCAUAUCAAAAACACGCCCTT<br>GGGCGUGUUUUUGAUUGAUU    |
