# Supplementary material for: Hypoxia-enhanced YAP1-EIF4A3 interaction drives circ_0007386 circularization by competing with CRIM1 pre-mRNA linear splicing and promotes non-small cell lung cancer progression
Source: PubMed Central journal article supplement (PMC11264895; doi:10.1186/s13046-024-03116-6), 2024-07-20
Supplement: 13046_2024_3116_MOESM3_ESM.pdf [file 13046_2024_3116_MOESM3_ESM.pdf]

**Table S2** Primers used in the experiments.

| 名称                                | 序列( 5' → 3' )                                         |
|-----------------------------------|-------------------------------------------------------|
| Hsa circ:chr3:169854206-169867032 | F:CAAGCCTGGAATCACGAAGC<br>R:GTTGGGTAATACTGCCGCTG      |
| Hsa circ:chr9:138709822-138774924 | F: AAGTCAAAGCCGAAGAAGCC<br>R: CCTGCTCATACTGGTCAACG    |
| Hsa circ:chr4:187560875-187584767 | F: ACGTCAAGGAAGCTAGACCG<br>R: TGAACGATGAAAGAGGCACG    |
| Hsa circ:chr9:96233422-96261168   | F:ACCACATTACTTAGGTTGC AC AG<br>R:CGTTCCGCCTCAGTTTTAGG |
| Hsa circ:chr5:138614015-138614818 | F: TGAATGACATCTACCTCCATCAG<br>R: ACCTGCCACTATTTCTCTCC |
| Has_circ_0007386                  | F: GCTGTGACCTCTATGAGTGC<br>R: GGCTTCTTCTTGTGGCA       |
| Has_circ_0007386(convergent)      | F:AGCTTGACTTCTGGCCTTCT<br>TCTCTGACCTTCTCTGGGGA        |
| β-actin(h)                        | F: AGCGAGCATCCCCAAAGTT<br>R: GGGCACGAAGGCTCATCATT     |
| U6                                | F: CTCGCTTCGGCAGCACA<br>R: AACGCTTCACGAATTTGCGT       |
| Hsa-miR-383-5p                    | R: AGATCAGAAGGTGATTGTGGCT                             |
| CIRBP                             | F: TGCCCCACTCACTTCTCT<br>R: CGGGGTCCTACCACACT         |
| CRIM1                             | F: CAGAACAAGCATTCCCCT<br>R: CCATCCAAACTCACTGTCC       |
| EIF4A3                            | F: AAGGGAGAGATGTCATCGCAC<br>R: GCTTGAGTTTACGAACCTGA   |
| YAP1                              | F: TAGCCCTGCGTAGCCAGTTA<br>R: TCATGCTTAGTCCACTGTCTGT  |
| CRIM1 pre-mRNA                    | F: ATGCCCATCCATTCTCACCA<br>R: GGTGGTGGAGGATGACAGAA    |
