# Supplementary material for: Hypoxia-enhanced YAP1-EIF4A3 interaction drives circ_0007386 circularization by competing with CRIM1 pre-mRNA linear splicing and promotes non-small cell lung cancer progression
Source: PubMed Central journal article supplement (PMC11264895; doi:10.1186/s13046-024-03116-6), 2024-07-20
Supplement: 13046_2024_3116_MOESM4_ESM.pdf [file 13046_2024_3116_MOESM4_ESM.pdf]

**Table S3. Antibodies used in the present study.**

| <b>Product</b>            | <b>Source</b>             | <b>No. of Catalogue</b> |
|---------------------------|---------------------------|-------------------------|
| <b>Western blot:</b>      |                           |                         |
| GAPDH                     | Bioworld                  | AP0066                  |
| Anti- $\beta$ -Actin      | Cell Signaling Technology | 4970S                   |
| Anti-CIRBP                | Proteintech               | 10209-2-AP              |
| Anti-Bcl2                 | Beyotime                  | AF6285                  |
| Anti-BAX                  | Beyotime                  | 50599-2-Ig              |
| Anti-Phospho-PI3K         | Beyotime                  | AF5905                  |
| Anti-PI3K                 | Beyotime                  | AF7742                  |
| Anti-AKT                  | Beyotime                  | AA326                   |
| Anti-Phospho-AKT1         | Beyotime                  | AF5740                  |
| Anti-YAP1                 | Bioss                     | bs-3605R                |
| Anti-CRIM1                | Bioss                     | bs-2034R                |
| Anti-EIF4A3               | Proteintech               | 17504-1-AP              |
| <b>Secondary antibody</b> |                           |                         |
| Anti-Rabbit IgG(H+L)      | Proteintech               | SA00001-2               |
| <b>IHC</b>                |                           |                         |
| Anti-Ki67                 | servicebio                | GB111499                |
| Anti-CIRBP                | Proteintech               | 10209-2-AP              |
| Anti-BAX                  | Proteintech               | 50599-2-Ig              |
| Anti-Bcl2                 | servicebio                | GB113375                |
| <b>RIP</b>                |                           |                         |
| IgG                       | Merck                     | PP64B                   |
| Anti-EIF4A3               | Proteintech               | 17504-1-AP              |
| <b>CoIP</b>               |                           |                         |
| IgG                       | Cell Signaling Technology | 3900S                   |
| Anti-EIF4A3               | Proteintech               | 17504-1-AP              |
| Anti-YAP1                 | Bioss                     | bs-3605R                |
