# Supplementary material for: Hypoxia-enhanced YAP1-EIF4A3 interaction drives circ_0007386 circularization by competing with CRIM1 pre-mRNA linear splicing and promotes non-small cell lung cancer progression
Source: PubMed Central journal article supplement (PMC11264895; doi:10.1186/s13046-024-03116-6), 2024-07-20
Supplement: 13046_2024_3116_MOESM5_ESM.pdf [file 13046_2024_3116_MOESM5_ESM.pdf]

**Table S4** Candidate miRNAs binding to circ\_0007386 predicted by CircInteractome.

| CircRNA<br>Mirbase ID        | CircRNA (Top) - miRNA<br>(Bottom) pairing                                                        | Site<br>Type |
|------------------------------|--------------------------------------------------------------------------------------------------|--------------|
| hsa_circ_0007386 (5' ... 3') | <pre> CUC AAGUCAGACTUACUCAGAU              CCUUCGGUAGUUCAGC-GACGUCC                     </pre>   | 7mer-1a      |
| hsa-miR-1184 (3' ... 5')     | <pre> CUC AAGUCAGACTUACUCAGAU               GAGUUUCGUUUUG--GACGUCC                     </pre>    | 7mer-1a      |
| hsa_circ_0007386 (5' ... 3') | <pre> GUGCAACCCCGCAGGCUGUCUGC         CUUUCACGUADCUUAGACAGACC                     </pre>         | 7mer-m8      |
| hsa-miR-1205 (3' ... 5')     | <pre> UUUUUUUUUUUAGAGA---AGCCAGAU               CCUCACUUCUGUCCUUGGUUU                     </pre> | 7mer-1a      |
| hsa_circ_0007386 (5' ... 3') | <pre> G AUGGUUGCUGUACUUUGCCAAC         UCACACUCAAGAGGUUACGGUUU                     </pre>        | 7mer-m8      |
| hsa-miR-182 (3' ... 5')      | <pre> UCCUGAAGAUUCUGUUCUGAUCG         UCGGUGUUAGUGGAAGACTAGA                     </pre>          | 7mer-m8      |
| hsa_circ_0007386 (5' ... 3') | <pre> UCGAGGGUUUUGUCUCCUCCUGGG         UCCCGGAGUCGGAGGACCA                     </pre>            | 7mer-m8      |
| hsa-miR-665 (3' ... 5')      | <pre> UUUUUUUUUUUUUUUUUUUUUUUUUUUUUU         GUGUACCGGUUUUGUCUCUUCU                     </pre>   | 7mer-m8      |
| hsa_circ_0007386 (5' ... 3') | <pre> AGGAGAGCCAGAUUCUCUCCAGG         GGUGGGUUCACUGGAUGAGGUUCU                     </pre>        | 7mer-m8      |
| hsa-miR-432 (3' ... 5')      | <pre> CUGUGACCCUCUAGGAGUGCAAAC         AAGUGAGGUUUUUCCAGGUUUU                     </pre>         | 7mer-m8      |
| hsa_circ_0007386 (5' ... 3') | <pre> CUGUGACCCUCUAGGAGUGCAAAC         UCUGUUCUCCGGUGGGCAGGUUUG                     </pre>       | 7mer-m8      |
| hsa-miR-507 (3' ... 5')      | <pre> UUUCUCCAGGGCCGUCUGAAG         UACUGUGAGGGACACUU                     </pre>                 | 7mer-1a      |
| hsa_circ_0007386 (5' ... 3') | <pre> CUCGAGAUUGGUUCUGUACUUUG         UUGUUUUAGCGGUUCAUGAAAA                     </pre>          | 7mer-m8      |
| hsa-miR-513a-5p (3' ... 5')  | <pre> UUGGGAGUGCUGUCCUUAACCA         UAGUCUCCAAGUUGAAUGGGG                     </pre>            | 8mer-1a      |
| hsa_circ_0007386 (5' ... 3') | <pre> CAGCCGGGAACCUU---AACAUACU               CAAGACAGGACCUUCUUUAUGA                     </pre>  | 7mer-m8      |
| hsa-miR-567 (3' ... 5')      |                                                                                                  |              |
